# Supplementary material
Source: Springer Nature journal article supplement (https://www.springermedizin.de/resource/supplementary/12874_2012_948_MOESM4_ESM.pdf/9433214)

**1-Day Forecasts**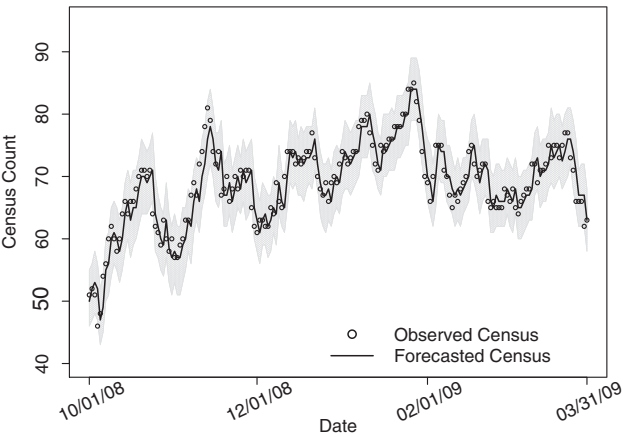**3-Day Forecasts**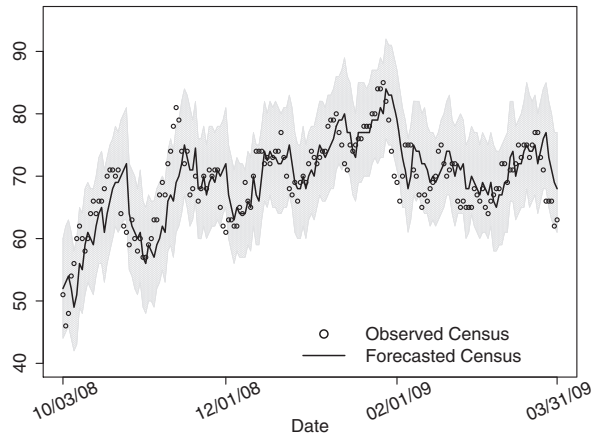**5-Day Forecasts**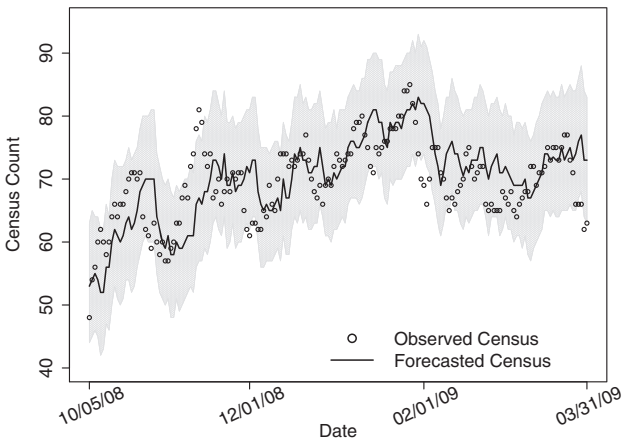**7-Day Forecasts**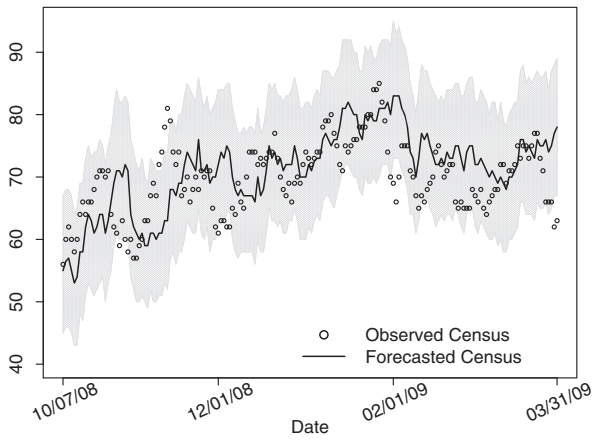

Supplement: MOESM4 [file 9433214]
